# Supplementary material
Source: PubMed Central journal article supplement (PMC3277104)
Supplement: 1118282109_pnas.201118282SI.pdf [file 1118282109_pnas.201118282SI.pdf]

# Supporting Information

Li et al. 10.1073/pnas.1118282109

## SI Materials and Methods

**Transgenic tobacco lines.** The TG34::nta-amiR:RDR6 (Fig. S3), *N-CFP<sup>T2T1</sup>* and *N-CFP<sup>2T1</sup>* tobacco transgenic lines were generated in tobacco cv. SR1 by *Agrobacterium*-mediated leaf disc transformation. Parental tobacco lines of TG34::nta-RNAi:DCL2, DCL4 were described previously (1).

**RNA isolation, sRNA northern blot analysis.** Total RNA was extracted from leaf tissue using the TRIzol reagent (Invitrogen) according to the manufacturer's protocol. Northern blot hybridization analysis and sRNA quantification were performed as described (1).

1. Kuang H, et al. (2009) Identification of miniature inverted-repeat transposable elements (MITEs) and biogenesis of their siRNAs in the Solanaceae: new functional implications for MITEs. *Genome Res* 19(1):42–56.

**miRNA cleavage assays.** Cleavage assays were conducted using the GeneRacer kit (Invitrogen) as described in the product manual.

**Small RNA libraries and sequencing.** Small RNA libraries were made according to the Illumina sRNA-seq protocol and sequenced using Illumina GA at the V.J. Coates Genomic Sequencing Laboratory, UC Berkeley.

**Bioinformatics.** Bioinformatic tools linked to Solanaceae sequence databases are available at the webserver *Solanaceae miRNA/tasiRNA Analysis Resources and Tools* (SoMART) (<http://somart.ist.berkeley.edu/>).



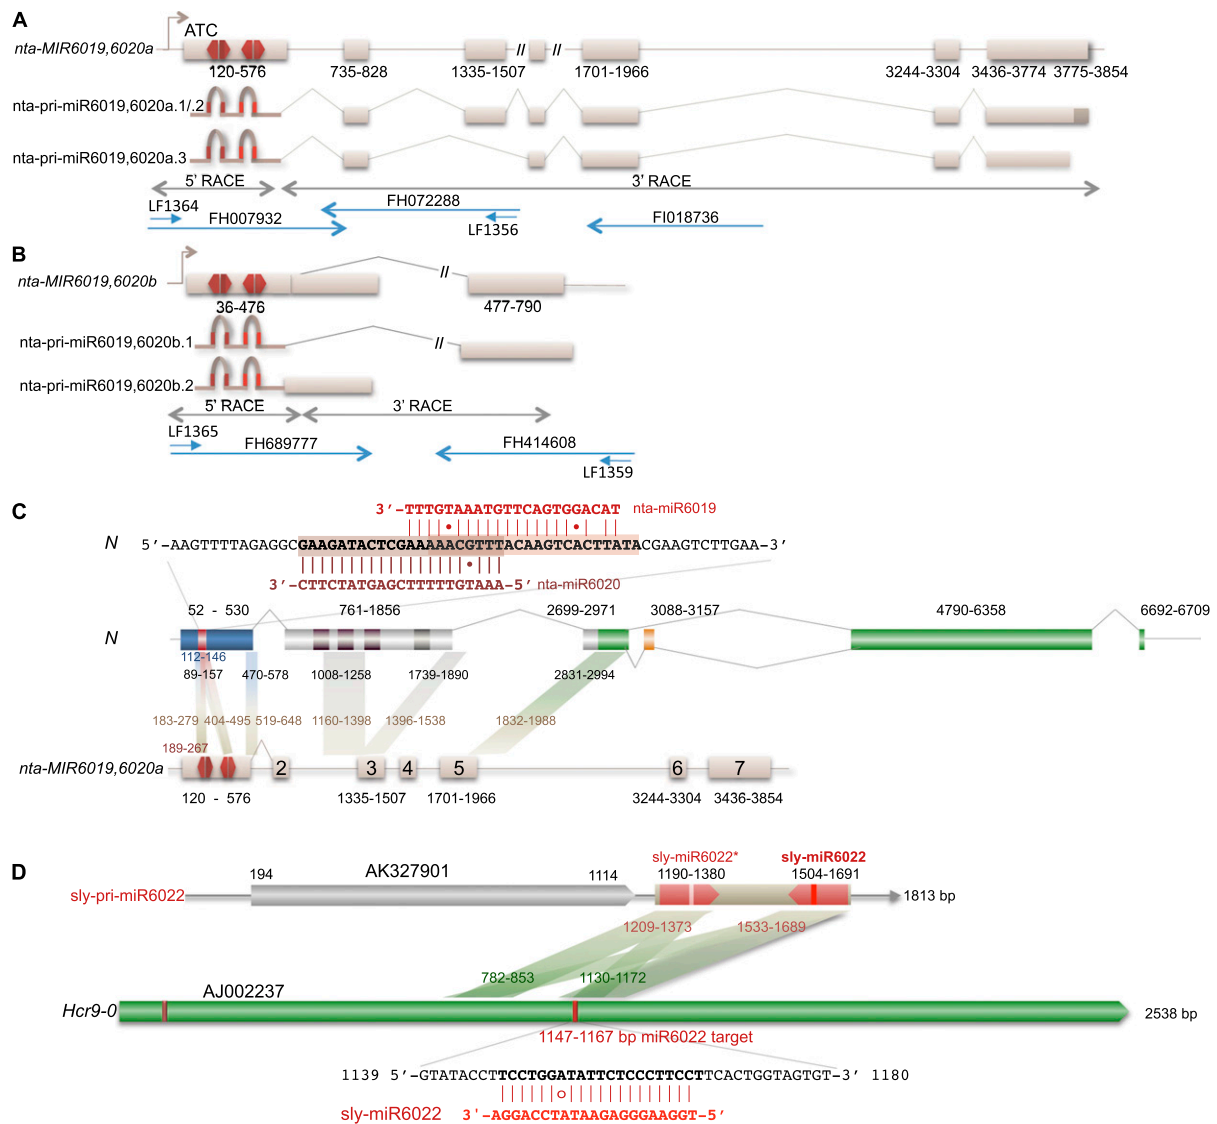

**Fig. S2.** (A) Maps of *nta-MIR6019,6020a* precursor locus and *nta-pri-miR6019,6020a* transcripts. *nta-pri-miR6019,6020a* sequences were determined by sequencing 5' and 3' RACE products of tobacco RNA. Primers used for 5' and 3' RACE are in Table S1. The progenitor *nta-MIR6019,6020a* sequence was determined by sequencing gaps in genomic DNA identified by alignment of 5' and 3' RACE products with available tobacco genome sequence. Sequences of *nta-MIR6019,6020a* and *nta-pri-miR6019,6020a.1/0.2* are provided in Dataset S1. (B) Maps of *nta-MIR6019,6020b* and *nta-pri-miR6019,6020b.1/0.2*. Sequences determined as described in Fig. S2A and available in Dataset S1. (C) *N* and *nta-MIR6019,6020a* sequence similarity. (Top) The sequences of 22-nt *nta-miR6019a* and 21-nt *nta-miR6020a* and target sequences in *N* are indicated as described in Fig. 1. (Middle) Map of the *N*-gene is shown as described in Fig. S1 with coordinates indicated in black above exons. (Bottom) Map of *nta-MIR6019,6020a* as described in Fig. S2A with coordinates indicated in black below exons. Shading between *N* and *nta-MIR6019,6020a* maps indicates regions of sequence similarity between *N* and *nta-MIR6019,6020a*. The coordinates of sequences with similarity in *N* are shown in blue below *N* exons, and homologous sequences in *nta-MIR6019,6020a* are indicated in tan above the *nta-MIR6019,6020a* exons. (D) *Hcr9-0* and *sly-pri-miR6022* sequence similarity. (Top) Map *sly-pri-miR6022* as described in Fig. S5 with coordinates indicated in black above ORF and *sly-premiR6022*. (Middle) Shading between *sly-pri-miR6022* and *Hcr9-0* maps indicates regions of sequence similarity between *sly-pri-miR6022* and *Hcr9-0*. The coordinates of *sly-pri-miR6022* sequences with similarity to *Hcr9-0* are shown in red below inverted repeats of *sly-premiR6022* (shaded red) and homologous *Hcr9-0* sequences are indicated in green above *Hcr9-0*. (Bottom) The target sequence of *sly-miR6022* (red) in *Hcr9-0* (black) is indicated as described in Fig. S5.

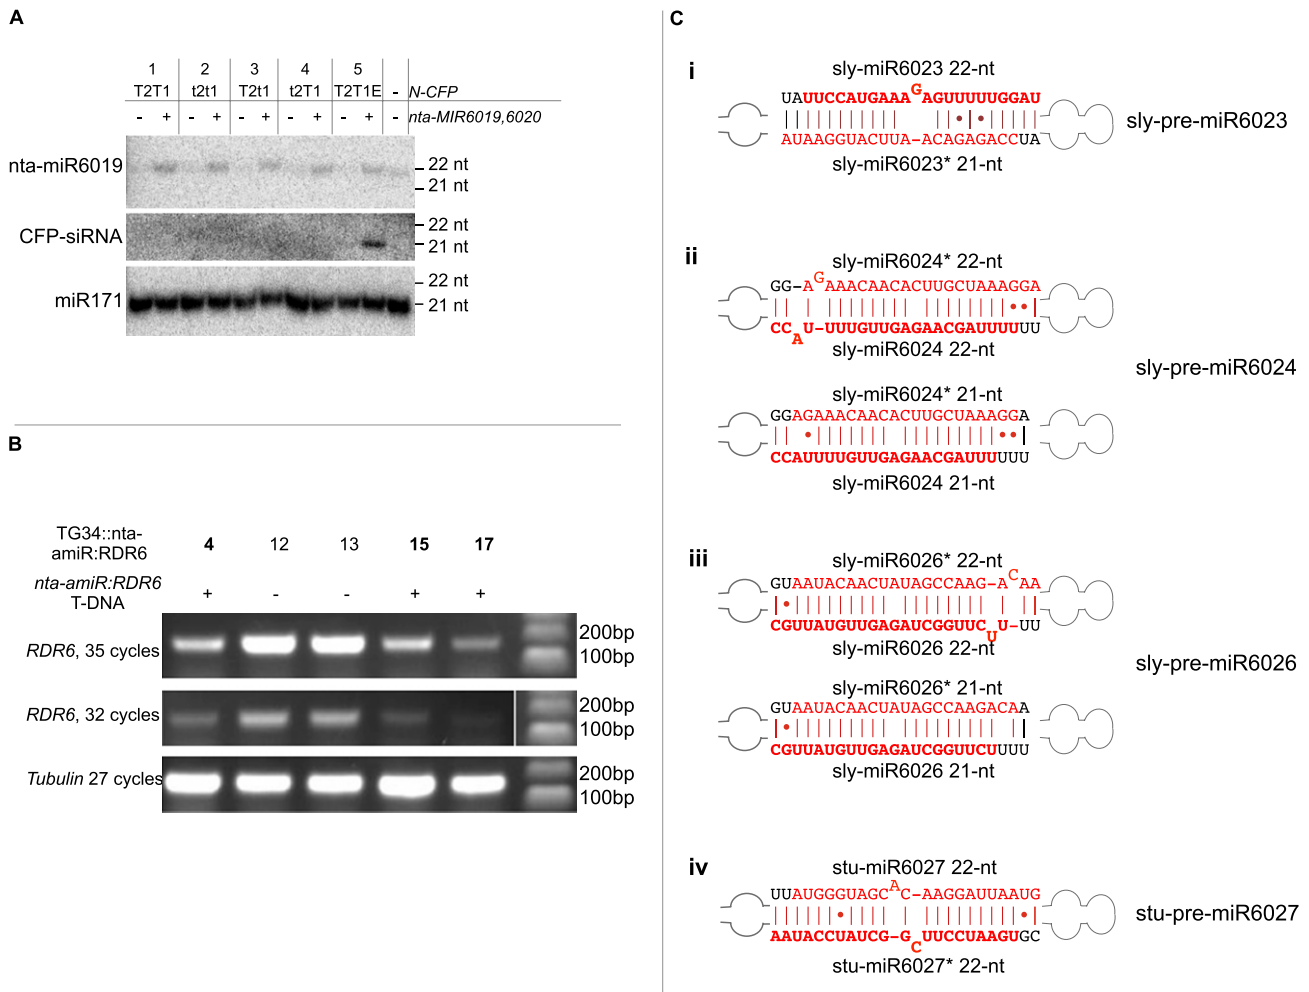

**Fig. S3.** (A) Northern blot hybridization analyses of sRNA isolated from *N. benthamiana* coinfiltrated with *N*-CFP sensors and *35S::nta-MIR6019,6020*. *N*-CFP sensors in each sample is indicated in lanes 1–5. Samples coinfiltrated with *35S::nta-MIR6019,6020* are indicated by “+”. Hybridization probes are indicated on left of each image. (B) Reduced expression of *RDR6* in TG34::nta-amiR:RDR6 transgenic lines. TG34::nta-amiR:RDR6 positive plants were produced from a cross between SR1::nta-amiR:RDR6 and TG34. Positive (+) F<sub>1</sub> progeny (samples, 4, 15, and 17) were identified by using *nta-amiR:RDR6* T-DNA-specific primers (Table S1). Semiquantitative RT-PCR was performed by using RNA extracted from F<sub>1</sub> progeny to quantify *RDR6* expression using primers DP193 and DP194 (Table S1), and a *Tubulin* reference (primers LF1051 and LF1052) as an internal control. Two control plants (samples 12 and 13) negative for T-DNA (-) were also included as controls. *RDR6* expression is reduced in all three plants carrying the *nta-amiR:RDR6* T-DNA (4, 15, 17) compared levels in control plants (12, 13). Transgenic *nta-amiR:RDR6* tobacco lines were generated in tobacco cv. SR1 by *Agrobacterium*-mediated leaf disk transformation. (C) Predicted premiRNA secondary structures. (i) Secondary structure of sly-premiR6023 with sly-miR6023 and sly-miRNA\* sequences indicated. (ii) Two alternative secondary structures for sly-premiR6024 with 21- or 22-nt sly-miR6024 and sly-miR6024\* indicated. (iii) Two alternative secondary structures for sly-premiR6026 with 21- or 22-nt sly-miR6026 and sly-miR6026\* indicated. (iv) Secondary structure of stu-premiR6027 with 22-nt stu-miR6027 and stu-miR6027\* indicated. The indicated miRNA and miRNA\* sequences were detected by using the bioinformatic pipeline (SoMART, <http://somart.ist.berkeley.edu>).



23-cleavage product sequences with late blight *R2* gene of *Solanum schenckii* (GU563976) and *Solanum tuberosum* (AC233613) and *Solanum phureja* (DMG400011529) *R2*-gene homologs (*R2-GH*). The red arrow indicates the predicted stu-miR482d cleavage site. (I) Map of *R2* homolog DMG400011529 with CC, NBS, and LRR domains shown in blue, gray, and green, respectively. The miR482d-targeted region is indicated by the red line. (J) Number (raw reads, y axis) and distribution of 21-nt secondary siRNAs on *R2-GH* (DMG400011529) indicated by blue line. Location of secondary siRNA 3'D8(+) (725-745) in-phase with stu-miR482d cleavage is indicated (gray arrow).

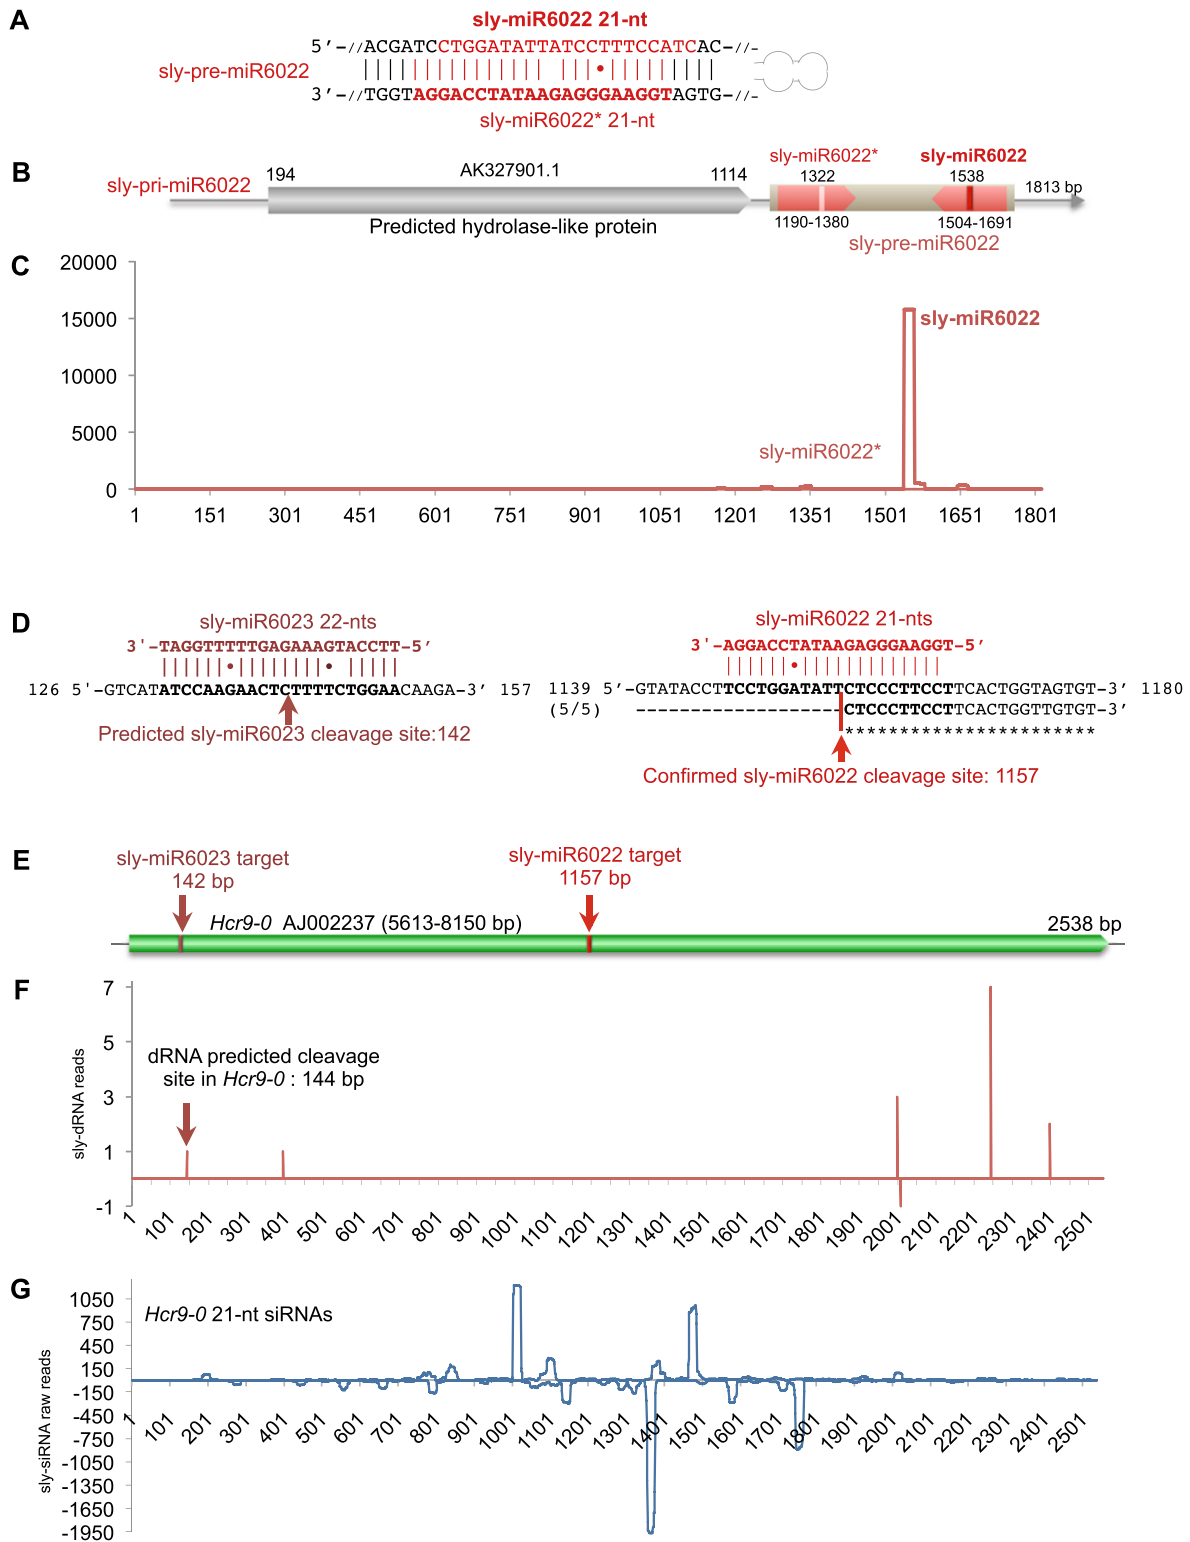

**Fig. S5.** Tomato *Cf9* homolog, *Hcr9-0*, is cleaved by sly-miR6022 and sly-miR6023 and produces secondary 21-nt siRNAs. (A) The secondary structure of the sly-pre-miR6022 with sly-miR6022 and sly-miR6022\* sequences indicated. (B) Map of the expressed sly-pri-miR6022 gene (full-length tomato cDNA AK327901) with coordinates of a predicted hydrolase-like protein ORF and the sly-pre-miR6022 region located in the 3' UTR indicated. (C) Number (raw reads, y axis) and distribution of sRNAs on sly-pri-miR6022 (AK327901, x axis) with the locations of mapped sly-miR6022 and sly-miR6022\* indicated. (D) Sequences of the predicted cleavage site of sly-miR6023 (Left) and confirmed cleavage site of sly-miR6022 (Right) on tomato *Cf9* homolog, *Hcr9-0*, (coordinates 1–2538 in figure correspond to coordinates 5613–8150 of AJ002237). (E) Map of *Hcr9-0* with miRNA target sites indicated. (F) The number and distribution of tomato degradome RNAs (dRNA library D51, SoMART at <http://somart.ist.berkeley.edu>) mapped to tomato *Hcr9-0*. The 5' terminus of a dRNA mapped to position 144 bp (indicated by dark red arrow) suggests cleavage at the predicted sly-miRNA6023 target site. The y axis indicates the number of dRNA raw reads in the sly-dRNA library mapped to *Hcr9-0* with 90% identity at the indicated positions (x axis). (G) The number of 21-nt siRNAs (raw reads SLY1 library, <http://somart.ist.berkeley.edu>) mapped to *Hcr9-0* (coordinates, x axis) indicated by the blue line.
